# Supplementary material for: Local Complement Regulation in Preeclampsia
Source: Research Square preprint supplement (doi:10.21203/rs.3.rs-680600/v1), 2021-08-03
Supplement: Supplementary file 1 [file 464a42320500e4129e81b32f.docx]

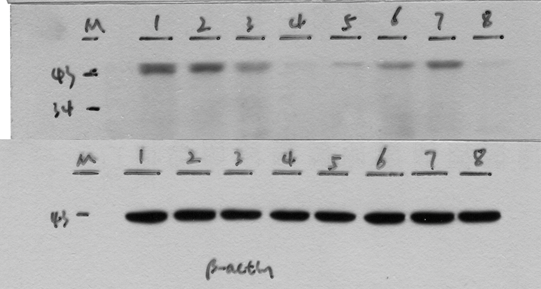


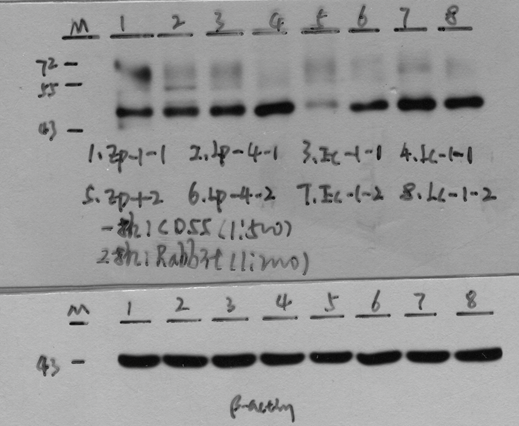


Figure 1. Western blot images of CD46 and CD55 in placentas of the EOSPE, LOSPE, E-control, and L-control groups.


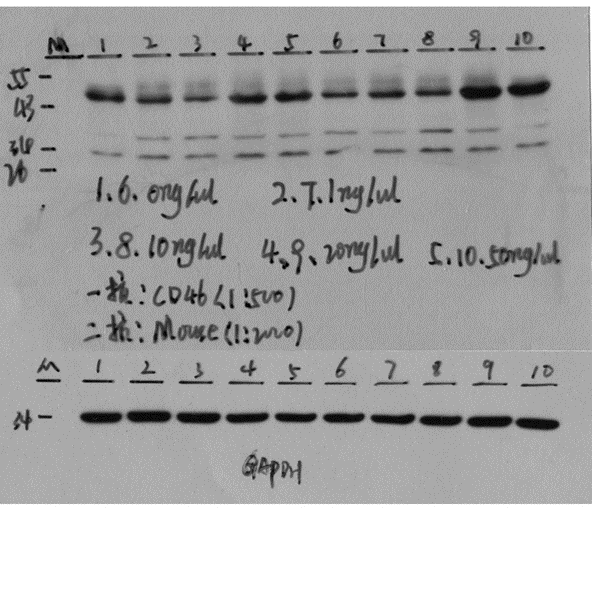


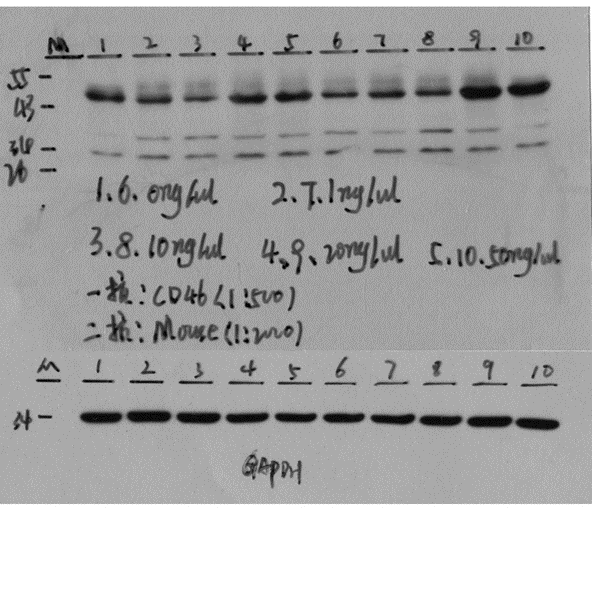


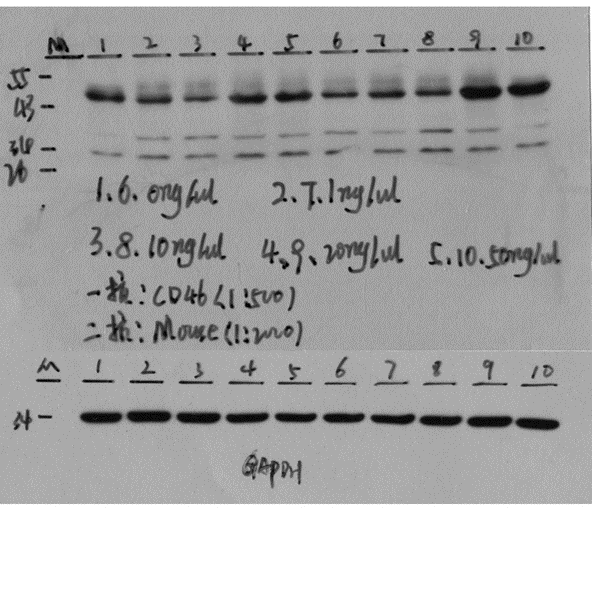


Figure 5. Expression of CD46 on HTR-8/Svneo after VEGF treatment.


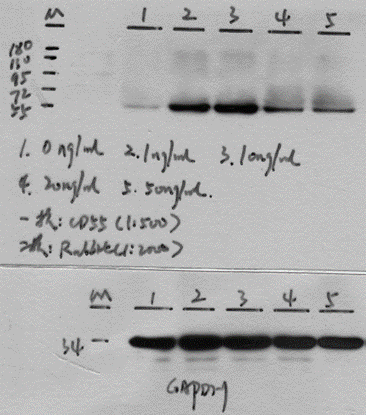


Figure 6. Expression of CD55 on HTR-8/Svneo after VEGF treatment.
